# Supplementary material for: Facile synthesis of nanosized nickel phosphides with controllable phase and morphology
Source: Royal Society of Chemistry journal article supplement (doi:10.1039/c3nj00665d), 2013-01-01
Supplement: c3nj00665d.pdf [file c3nj00665d.pdf]

## Supporting Information

### Facile synthesis of nanosized nickel phosphides with controllable phase and morphology

Yanyan Deng, Yu Zhou, Yue Yao, Jun Wang\*

State Key Laboratory of Materials-Oriented Chemical Engineering, College of Chemistry and Chemical Engineering, Nanjing University of Technology, Nanjing 210009, China.

\* Corresponding author. Tel: +86-25-83172264; E-mail: junwang@njut.edu.cn

Table S1 Viscosity of the solvent at room temperature.

| Solvent           | MeOH  | EtOH | EG   | GL   | DEG  |
|-------------------|-------|------|------|------|------|
| Viscosity (mpa·s) | 0.580 | 1.17 | 22.1 | 1412 | 35.7 |

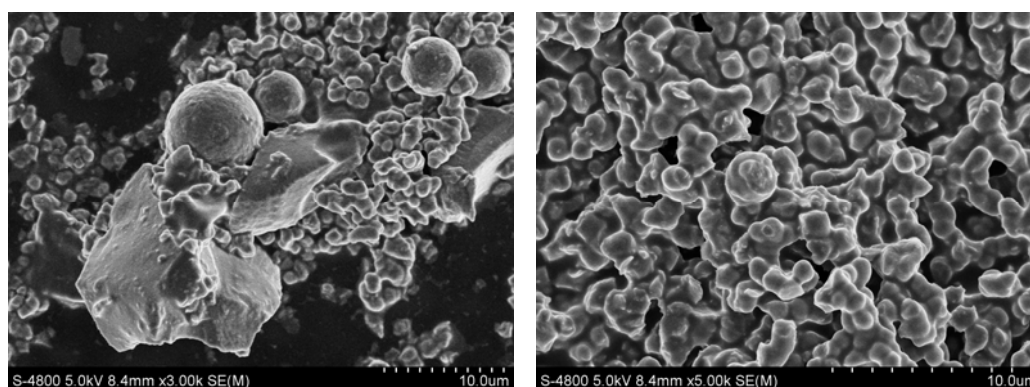

Figure S1 SEM images of red phosphorus.

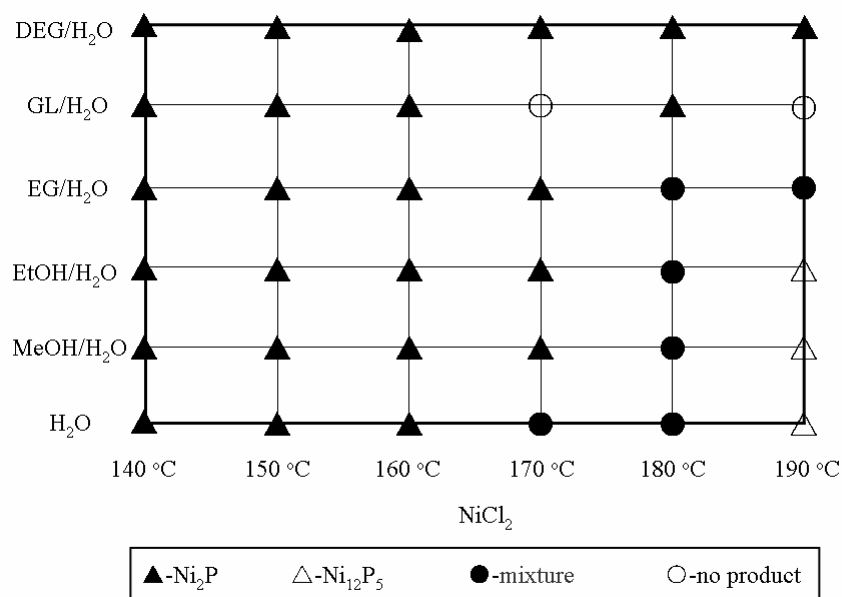

Figure S2 Binary phase diagram of nickel phosphides synthesized by using  $\text{NiCl}_2 \cdot 6\text{H}_2\text{O}$  as the nickel source.

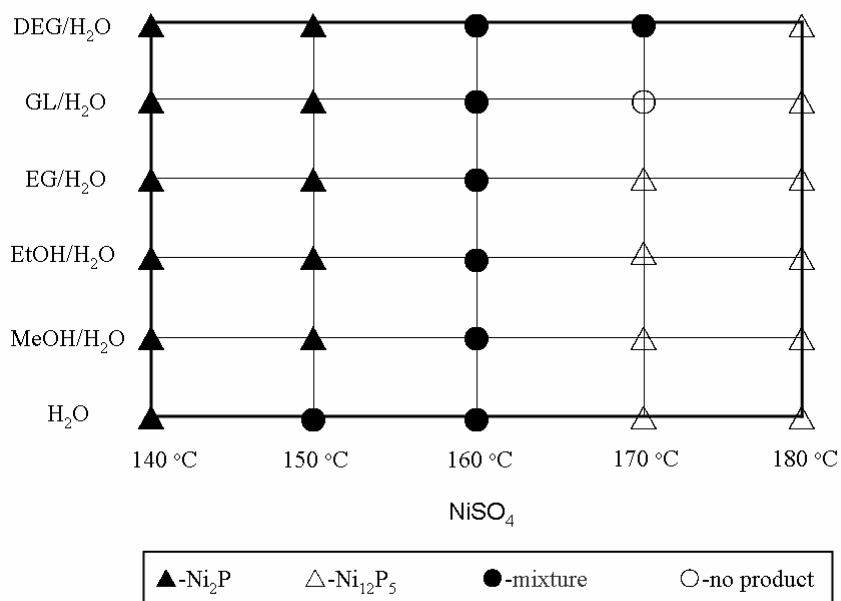

Figure S3 Binary phase diagram of nickel phosphides synthesized by using NiSO<sub>4</sub>·6H<sub>2</sub>O as the nickel source.

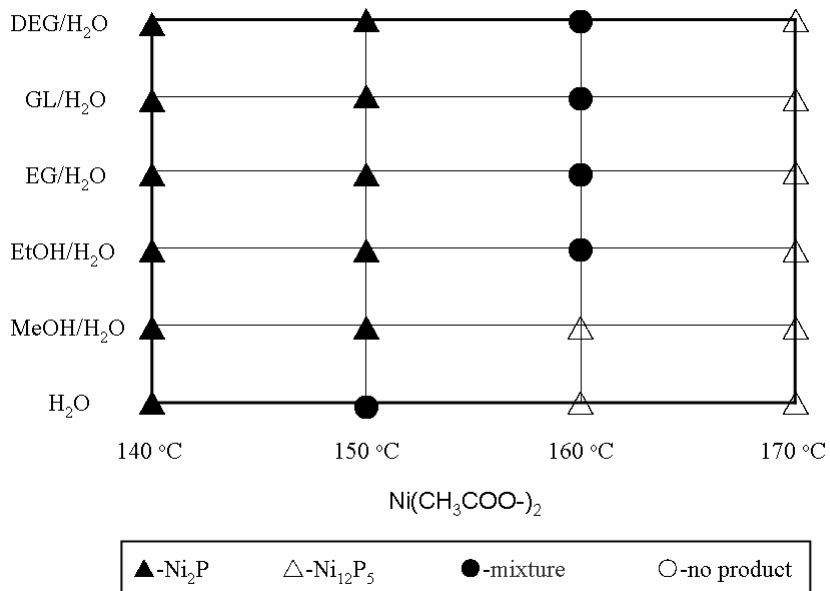

Figure S4 Binary phase diagram of nickel phosphides synthesized by using Ni(CH<sub>3</sub>COO)<sub>2</sub>·4H<sub>2</sub>O as the nickel source.

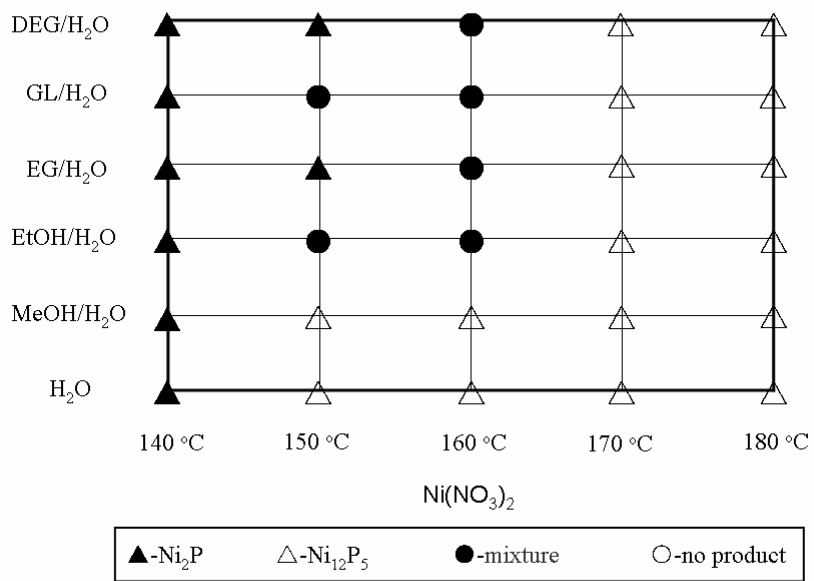

Figure S5 Binary phase diagram of nickel phosphides synthesized by using Ni(NO<sub>3</sub>)<sub>2</sub>·6H<sub>2</sub>O as the nickel source.
